# Supplementary material
Source: publisher figshare collection journal article supplement (https://acs.figshare.com/ndownloader/files/7725574)
Supplement: Supplementary file 1 [file 7725574]

## Supporting Information

### Direct Functionalization of an Acid-Terminated Nanodiamond with Azide: Enabling Access to 4-Substituted-1,2,3-Triazole Functionalized Particles

*Zachary C. Kennedy, Christopher A. Barrett, and Marvin G. Warner*

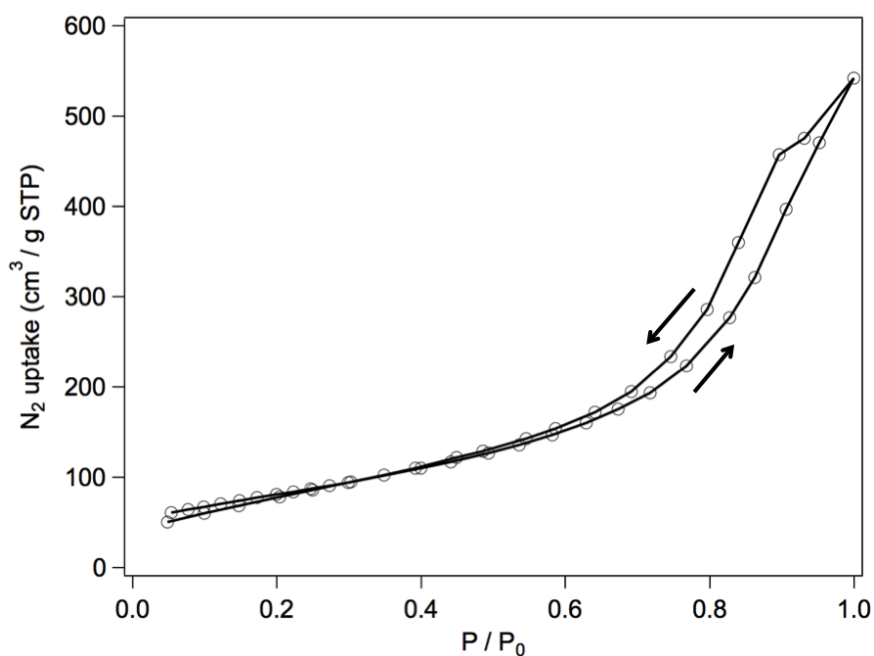

**Figure S1:** Gas (N<sub>2</sub>) adsorption and desorption for ND-1. BET surface area: 296 m<sup>2</sup> g<sup>-1</sup>.
